# Supplementary material for: Understanding AP2/ERF Transcription Factor Responses and Tolerance to Various Abiotic Stresses in Plants: A Comprehensive Review
Source: MDPI journal article supplement (doi:10.3390/ijms25020893), 2024-01-11
Supplement: s1 [file s1]

## Sheet: Sheet1
Supplementary Table S1. Classification of structural domains contained in AP2/ERF transcription factors and their distribution and quantity in different plants.
Species	Brassica napus	Solanum tuberosum	Pyrus pyrifolia	Saccharum spontaneum	Apium graveolens	Actinidia chinensis	Solanum lycopersicum	Physcomitrium patens	Solanum melongena	Capsicum annuum	Zea mays	Oryza sativa	Arabidopsis thaliana	Ziziphus jujuba	Populus	Citrus maxima	Dimocarpus longan	Malus sieversii	Ananas comosus
AP2	58	49	38	43	30	40	42	22	22	29	31	26	18	23	26	16	19	17	24
ERF	250	136	188	101	174	175	100	81	104	144	84	79	65	116	91	107	61	57	48
DREB	194	58		59			44	76	49		49	52	57		19		40	25	22
RAV	26	2	8	11	5	5	3	2	2	1	2	7	6	1	5	4	4	5	2
Solosist	3	1	0	4	0	0	1	2	1	5	1	0	1	1	1	1	1	2	1
Sum	531	246	234	218	209	209	190	183	178	175	167	164	147	145	142	127	125	106	97
